# Supplementary material
Source: publisher figshare collection journal article supplement (https://tandf.figshare.com/ndownloader/files/20135213)
Supplement: Supplementary file 1 [file 20135213]

**SUPPLEMENTARY METERIAL**

**A water balance model to estimate climate change impact on groundwater recharge in Yucatan Peninsula, Mexico**

**Edgar Rodríguez-Huerta *et al*.**

Land-use / land cover (LULC) plays an important role in the retention of water in the soil. Tropical forests have deeper roots so that water retention is greater than in pastures. Five categories of typical vegetation-root depths for five different soil types are provided in Table 2 of the main document. These parameters are associated with the different land uses given by INEGI (2013b). The 75 different land uses are grouped according to the maximum root depth ranges.

Table S1. Land use are grouped according to the range of maximum root depth.

| CODE | Description (in Spanish) | Vegetation root depth category |
| --- | --- | --- |
| 10101010304 | Agricultura de temporal permanente | Moderate |
| 10101040102 | Agricultura de temporal anual y semipermanente | Moderate |
| 10101040103 | Agricultura de temporal anual y permanente | Moderate |
| 10101040104 | Agricultura de temporal anual | Moderate |
| 10101040203 | Agricultura de temporal semipermanente y permanente | Moderate |
| 10101040204 | Agricultura de temporal semipermanente | Moderate |
| 10102010304 | Agricultura de riego permanente | Moderate |
| 10102040102 | Agricultura de riego anual y semipermanente | Moderate |
| 10102040103 | Agricultura de riego anual y permanente | Moderate |
| 10102040104 | Agricultura de riego anual | Moderate |
| 10102040203 | Agricultura de riego semipermanente y permanente | Moderate |
| 10102040204 | Agricultura de riego semipermanente | Moderate |
| 10103040102 | Agricultura de humedad anual y semipermanente | Moderate |
| 10103040103 | Agricultura de humedad anual y permanente | Moderate |
| 10103040104 | Agricultura de humedad anual | Moderate |
| 10201040304 | Pastizal cultivado | Deep |
| 10301030304 | Bosque cultivado | Orchard |
| 10401040000 | Acuícola | Moderate |
| 20201010500 | Vegetación secundaria arbórea de bosque de encino | Orchard |
| 20201020600 | Vegetación secundaria arbustiva de bosque de encino | Orchard |
| 20401010400 | Selva alta perennifolia | Mature forest |
| 20401020500 | Vegetación secundaria arbórea de selva alta perennifolia | Orchard |
| 20401020600 | Vegetación secundaria arbustiva de selva alta perennifolia | Orchard |
| 20402010400 | Selva alta subperennifolia | Mature forest |
| 20402020400 | Vegetación secundaria herbácea de selva alta subperennifolia | Orchard |
| 20402020500 | Vegetación secundaria arbórea de selva alta subperennifolia | Orchard |
| 20402020600 | Vegetación secundaria arbustiva de selva alta subperennifolia | Orchard |
| 20404010400 | Selva mediana subperennifolia | Mature forest |
| 20404020500 | Vegetación secundaria arbórea de selva mediana subperennifolia | Orchard |
| 20404020600 | Vegetación secundaria arbustiva de selva mediana subperennifolia | Orchard |
| 20404020700 | Vegetación secundaria herbácea de selva mediana subperennifolia | Orchard |
| 20405010400 | Selva baja perennifolia | Orchard |
| 20406010400 | Selva baja subperennifolia | Orchard |
| 20406020500 | Vegetación secundaria arbórea de selva baja subperennifolia | Deep |
| 20501010400 | Selva mediana subcaducifolia | Orchard |
| 20501020500 | Vegetación secundaria arbórea de selva mediana subcaducifolia | Orchard |
| 20501020600 | Vegetación secundaria arbustiva de selva mediana subcaducifolia | Orchard |
| 20501020700 | Vegetación secundaria herbácea de selva mediana subcaducifolia | Orchard |
| 20502010400 | Selva baja subcaducifolia | Orchard |
| 20502020500 | Vegetación secundaria arbórea de selva baja subcaducifolia | Deep |
| 20502020600 | Vegetación secundaria arbustiva de selva baja subcaducifolia | Deep |
| 20601010400 | Selva mediana caducifolia | Mature forest |
| 20601020500 | Vegetación secundaria arbórea de selva mediana caducifolia | Orchard |
| 20601020600 | Vegetación secundaria arbustiva de selva mediana caducifolia | Orchard |
| 20601020700 | Vegetación secundaria herbácea de selva mediana caducifolia | Orchard |
| 20602010400 | Selva baja caducifolia | Orchard |
| 20602020500 | Vegetación secundaria arbórea de selva baja caducifolia | Deep |
| 20602020600 | Vegetación secundaria arbustiva de selva baja caducifolia | Deep |
| 20602020700 | Vegetación secundaria herbácea de selva baja caducifolia | Deep |
| 20701020500 | Vegetación secundaria arbórea de selva baja espinosa caducifolia | Deep |
| 20701020600 | Vegetación secundaria arbustiva de selva baja espinosa caducifolia | Deep |
| 20702010400 | Selva baja espinosa subperennifolia | Deep |
| 20702020500 | Vegetación secundaria arbórea de selva baja espinosa subperennifolia | Deep |
| 20702020600 | Vegetación secundaria arbustiva de selva baja espinosa subperennifolia | Deep |
| 20702020700 | Vegetación secundaria herbácea de selva baja espinosa subperennifolia | Deep |
| 20802010400 | Pastizal halófilo | Deep |
| 20807010400 | Sabana | Deep |
| 21001020500 | Vegetación secundaria arbórea de selva de galería | Orchard |
| 21003010400 | Manglar | Moderate |
| 21003020500 | Vegetación secundaria arbórea de manglar | Orchard |
| 21003020600 | Vegetación secundaria arbustiva de manglar | Orchard |
| 21006030400 | Popal | Deep |
| 21007030400 | Tular | Deep |
| 21008010400 | Vegetación de petén | Deep |
| 21008020500 | Vegetación secundaria arbórea de vegetación de petén | Deep |
| 21009010400 | Vegetación halófila hidrófila | Moderate |
| 21102010400 | Vegetación de dunas costeras | Moderate |
| 21103010400 | Palmar natural | Deep |
| 21201030300 | Sin vegetación aparente | Shallow |
| 21301030300 | Palmar inducido | Deep |
| 21302030300 | Pastizal inducido | Deep |
| 30000000030 | Desprovisto de vegetación | Shallow |
| 30000000031 | Cuerpo de agua | None |
| 30000000032 | Asentamientos humanos | Moderate |
| 30000000033 | Zona urbana | Moderate |

The spatial distribution of the difference in groundwater recharge between projections and historical data for each GCM used in the study are given in Figs S1 and S2.


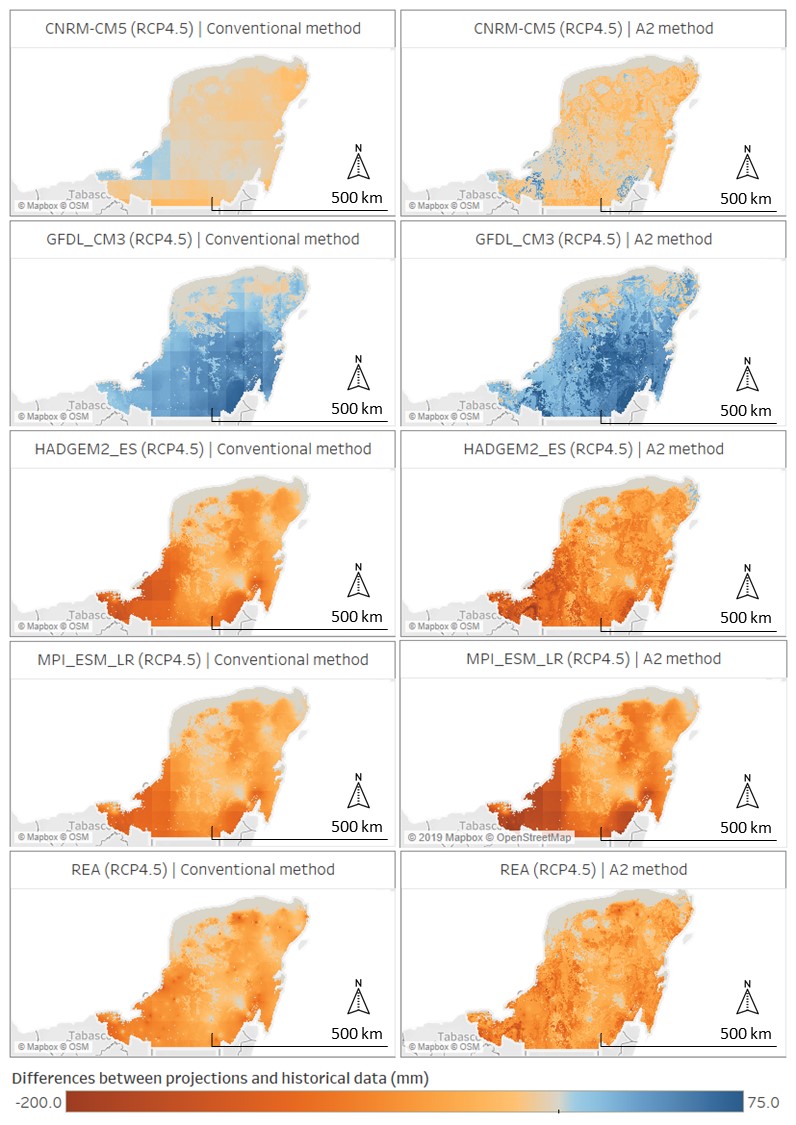


Figure S1.


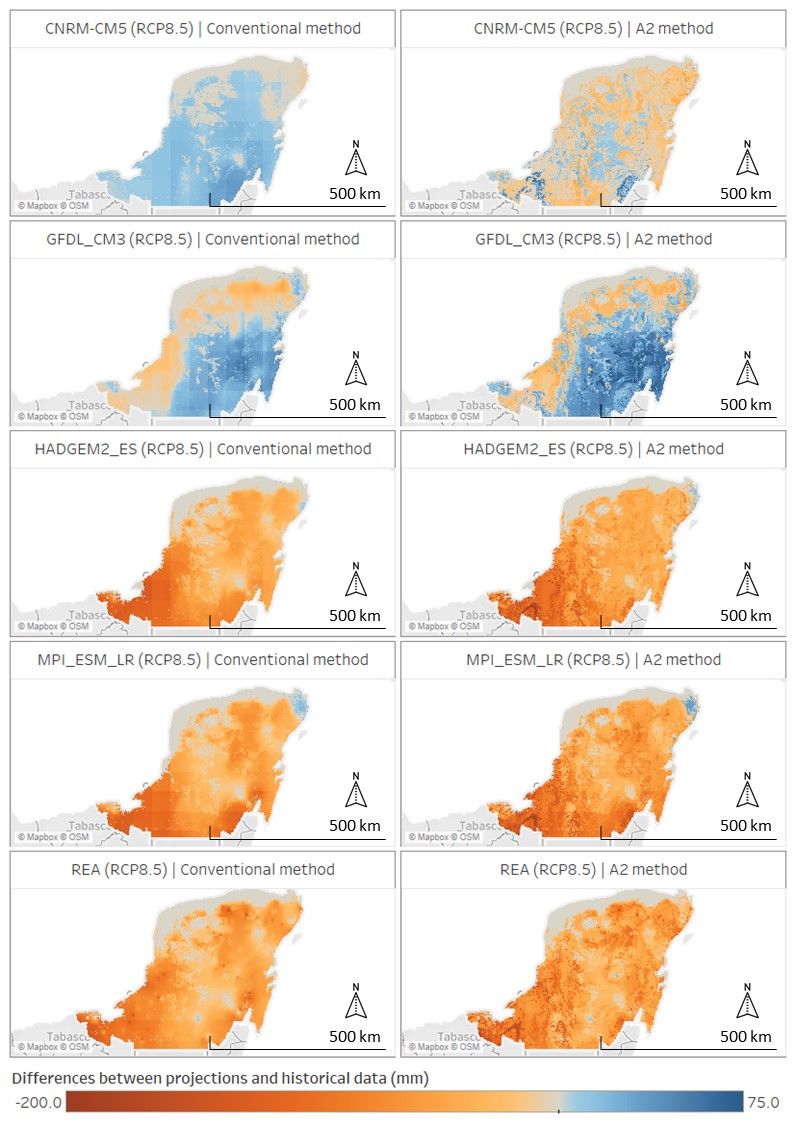


**Figure S2.**
